# Supplementary material for: The role of the dynein light intermediate chain in retrograde IFT and flagellar function in Chlamydomonas
Source: PubMed Central journal article supplement — Mol Biol Cell. 2016 Aug 1;27(15):2404–22. doi: 10.1091/mbc.E16-03-0191 (PMC4966982; doi:10.1091/mbc.e16-03-0191), 2016-08-01
Supplement: supp_E16-03-0191v1_CombinedSupMats.pdf [file supp_E16-03-0191v1_CombinedSupMats.pdf]

# Supplemental Materials

*Molecular Biology of the Cell*

Reck et al.

## Supplementary Materials-Reck et al.

**Supplemental Table 1.** Retrograde IFT motor subunits in *Chlamydomonas* and humans

**Supplemental Table 2.** *Chlamydomonas* strains used in this study

**Supplemental Table 3.** Antibodies used in this study

**Figure S1.** Strategy used to identify strains that express reduced levels of D1bLIC.

**Figure S2.** Flagellar length distributions in WT and *d1blic* mutant cells.

**Figure S3.** Movement of D1bLIC-GFP observed by TIRF microscopy in the presence and absence of the endogenous D1bLIC subunit.

**Figure S4.** Transport of IFT particles observed by DIC microscopy in different retrograde mutants.

**Supplemental Video 1.** IFT in a WT cell immobilized in agarose and observed by DIC microscopy as shown in Figure 2A.

**Supplemental Video 2.** IFT in a *RNAi-A* strain immobilized in agarose and observed by DIC microscopy as shown in Figure 2A.

**Supplemental Video 3.** IFT in a *d1blic* strain immobilized in agarose and observed by DIC microscopy as shown in Figure 4A.

**Supplemental Video 4.** IFT in a *d1blic::D1bLIC-GFP* strain immobilized in agarose and observed by DIC microscopy using an AxioCam MRm camera at ~25 f/s as shown in Figure 4E.

**Supplemental Video 5.** IFT in a *d1blic::D1bLIC-GFP* strain immobilized by EGTA and observed by TIRF microscopy using a QuantEM 512SC camera at ~16 f/s as shown in Figure 4E.

**Supplemental Video 6.** IFT in a *d1bLIC::D1bLIC-GFP* strain immobilized by EGTA and observed by TIRF microscopy followed by photobleaching of one flagellum as shown in Figure 4H.

**Supplemental Video 7.** IFT in a *pf18::D1bLIC-GFP* strain observed by TIRF microscopy as shown in Figure S3.

**Supplemental Video 8.** IFT in a *pf28-pf9-2 E8::D1bLIC-GFP* strain observed by TIRF microscopy as shown in Figure S3.

**Supplemental Video 9.** IFT in a *fla24* strain observed by DIC microscopy as shown in Figure S4.

**Supplemental Video 10.** IFT in a *fla2* strain observed by DIC microscopy as shown in Figure S4.

**Supplemental Video 11.** IFT in a *fla14* strain observed by DIC microscopy as shown in Figure S4.

## Supplemental References

**Supplemental Table 1.** Retrograde IFT motor subunits in *Chlamydomonas* and humans

| <i>C. reinhardtii</i>                 | <i>H. sapiens</i> | References                                                                            |
|---------------------------------------|-------------------|---------------------------------------------------------------------------------------|
| <b>Heavy chain (HC)</b>               |                   |                                                                                       |
| DHC1b                                 | DYNC2H1           | Pazour et al., 1999, Porter et al., 1999                                              |
| <b>Intermediate chain (IC)</b>        |                   |                                                                                       |
| D1bIC1/FAP163                         | WDR60             | Patel-King et al., 2013; Asante et al., 2014                                          |
| D1bIC2/FAP133                         | WDR34             | Rompolas et al., 2007; Asante et al., 2014                                            |
| <b>Light intermediate chain (LIC)</b> |                   |                                                                                       |
| D1bLIC                                | DYNC2LI1          | Grissom et al., 2002; Mikami et al., 2002; Perrone et al., 2003; Hou and Witman, 2004 |
| <b>Light chain (LC)</b>               |                   |                                                                                       |
| TCTEX1                                | DYNLT1/T3         | Asante et al., 2014; Schmidts et al., 2015                                            |
| TCTEX2b                               | TCTEX1D2          | DiBella et al., 2004; Asante et al., 2014; Schmidts et al., 2015                      |
| LC7b/LC7a?                            | DYNLRB1/B2        | Asante et al., 2014; Schmidts et al., 2015                                            |
| LC8                                   | DYNLL1/LL2        | Pazour et al., 1998; Asante et al., 2014; Schmidts et al., 2015                       |

**Supplemental Table 2.** *Chlamydomonas* strains used in this study

| Strain                                       | CC number | Reference                       |
|----------------------------------------------|-----------|---------------------------------|
| <b>Wild-type strains</b>                     |           |                                 |
| 137c, <i>mt+</i> ( <i>nit1 nit2</i> )        | CC-125    | Harris, 2009                    |
| 137c, <i>mt-</i> ( <i>nit1 nit2 agg1</i> )   | CC-124    | Harris, 2009                    |
| 21 gr, <i>mt+</i>                            | CC-1690   | Sager, 1955                     |
| A54 e18, <i>mt+</i> ( <i>sr1 ac17 nit1</i> ) | CC-2929   | Schnell et al., 1993            |
| <i>arg7-2, mt-</i>                           | CC-1820   | Loppes, 1969                    |
| <b>Motility mutants</b>                      |           |                                 |
| <i>pf18, mt+</i>                             | CC-1036   | Warr et al., 1966               |
| <i>pf9-2 pf28 E8, mt+</i>                    | CC-3903   | Porter et al., 1992             |
| <b>DHC1b mutants</b>                         |           |                                 |
| <i>stf1-1</i> (T3B8)                         | CC-3915   | Porter et al., 1999             |
| <i>stf1-2</i> (3B12)                         | CC-3916   | Porter et al., 1999             |
| <i>dhc1b-1, mt+</i>                          | CC-3711   | Pazour et al., 1999             |
| <i>dhc1b-3, mt+</i>                          | CC-4422   | Engel et al., 2012              |
| <i>dhc1b-3, mt-</i>                          | CC-4423   | Engel et al., 2012              |
| <i>fla24, mt-</i>                            | CC-3866   | Iomini et al., 2001             |
| <b>D1bLIC related</b>                        |           |                                 |
| <i>d1blic-RNAi-A mt+</i> (4e11)              | CC-4491   | this study                      |
| <i>d1blic-RNAi-B mt+</i> (4a2)               | CC-4492   | this study                      |
| <i>d1blicΔ mt+</i> (T8D9*)                   | CC-4487   | this study                      |
| <i>d1blicΔ mt+</i> (TBD9*)                   | CC-4053   | Hou et al., 2004                |
| <i>d1blicΔ mt-</i> (YH43)                    | CC-4054   | Hou et al., 2004                |
| <i>d1blic::D1bLIC-GFP mt+</i> (13D)          | CC-4488   | Rescue of T8D9, this study      |
| <i>d1blic::D1bLIC-GFP mt-</i>                | CC-4574   | Rescue of YH43, this study      |
| <i>pf18::D1bLIC-GFP mt+</i>                  | CC-4489   | this study                      |
| <i>pf9-2 pf28 E8::D1bLIC-GFP mt+</i> (A4)    | CC-4490   | Porter et al., 1992; this study |
| <b>LC8 related</b>                           |           |                                 |
| <i>fla14-1, mt+</i>                          | CC-3937   | Pazour et al., 1998             |
| <i>fla14-2, mt+</i>                          | CC-3938   | Pazour et al., 1998             |
| <i>fla14-1::FLA14, mt -</i>                  | CC-3939   | Pazour et al., 1998             |
| <b>IFT mutants</b>                           |           |                                 |
| <i>fla2, mt-</i>                             | CC-1390   | Huang et al., 1977              |

\*T8D9 and TBD9 are presumed to be the same strain, but the name changed in transit between different laboratories. Both contain an uncharacterized paralyzed flagellar mutation (this study).

**Supplemental Table 3.** Antibodies used in this study

| <b>Antigen</b>               | <b>Dilution for Blot</b> | <b>Reference/Source</b>   |
|------------------------------|--------------------------|---------------------------|
| <b>Retrograde motor</b>      |                          |                           |
| DHC1b                        | 1:3000-1:5000            | Perrone et al., 2003      |
| D1bLIC                       | 1:20000                  | Perrone et al., 2003      |
| D1bIC2/FAP133                | 1:20000                  | This study                |
| LC8 (R4058)                  | 1:50                     | King and Patel-King, 1995 |
| <b>Anterograde motor</b>     |                          |                           |
| KAP                          | 1:1000-1:10000           | Mueller et al., 2005      |
| FLA10 (neck)                 | 1:5000-1:20000           | Cole et al., 1998         |
| <b>IFT particle subunits</b> |                          |                           |
| IFT172                       | 1:3000                   | Cole et al., 1998         |
| IFT139                       | 1:3000                   | Cole et al., 1998         |
| <b>Other</b>                 |                          |                           |
| IC2/IC69                     | 1:20000                  | Sigma D6168               |
| $\alpha$ -Tubulin            | 1:1000-1:2000            | Sigma T-5168              |
| AOX                          | 1:3000-1:15000           | Agrisera AS06 152         |
| RSP16                        | 1:10000-1:20000          | Yang et al., 2005         |
| PKD2                         | 1:2000                   | Huang et al., 2007        |
| GFP                          | 1:5000                   | Covance MMS-118P          |

## Supplemental references

- Asante, D., Stevenson, N.L., and Stephens, D.J. (2014). Subunit composition of the human cytoplasmic dynein-2 complex. *J Cell Sci* *127*, 4774-4787.
- Cole, D.G., Diener, D.R., Himelblau, A.L., Beech, P.L., Fuster, J.C., and Rosenbaum, J.L. (1998). *Chlamydomonas* kinesin-II-dependent intraflagellar transport (IFT): IFT particles contain proteins required for ciliary assembly in *Caenorhabditis elegans* sensory neurons. *J Cell Biol* *141*, 993-1008.
- DiBella, L.M., Smith, E.F., Patel-King, R.S., Wakabayashi, K., and King, S.M. (2004). A novel Tctex2-related light chain is required for stability of inner dynein arm I1 and motor function in the *Chlamydomonas* flagellum. *J Biol Chem* *279*, 21666-21676.
- Engel, B.D., Ishikawa, H., Wemmer, K.A., Geimer, S., Wakabayashi, K., Hirono, M., Craige, B., Pazour, G.J., Witman, G.B., Kamiya, R., and Marshall, W.F. (2012). The role of retrograde intraflagellar transport in flagellar assembly, maintenance, and function. *J Cell Biol* *199*, 151-167.
- Grissom, P.M., Vaisberg, E.A., and McIntosh, J.R. (2002). Identification of a novel light intermediate chain (D2LIC) for mammalian cytoplasmic dynein 2. *Mol Biol Cell* *13*, 817-829.
- Harris, E. (2009). *The Chlamydomonas Sourcebook: Introduction to Chlamydomonas and Its Laboratory Use*. Academic Press: San Diego, CA.
- Hou, Y., Pazour, G.J., and Witman, G.B. (2004). A dynein light intermediate chain, D1bLIC, is required for retrograde intraflagellar transport. *Mol Biol Cell* *15*, 4382-4394.
- Huang, B., Rifkin, M.R., and Luck, D.J. (1977). Temperature-sensitive mutations affecting flagellar assembly and function in *Chlamydomonas reinhardtii*. *J Cell Biol* *72*, 67-85.
- Huang, K., Diener, D.R., Mitchell, A., Pazour, G.J., Witman, G.B., and Rosenbaum, J.L. (2007). Function and dynamics of PKD2 in *Chlamydomonas reinhardtii* flagella. *J Cell Biol* *179*, 501-514.
- Iomini, C., Babaev-Khaimov, V., Sassaroli, M., and Piperno, G. (2001). Protein particles in *Chlamydomonas* flagella undergo a transport cycle consisting of four phases. *J Cell Biol* *153*, 13-24.
- King, S.M., and Patel-King, R.S. (1995). The M(r) = 8,000 and 11,000 outer arm dynein light chains from *Chlamydomonas* flagella have cytoplasmic homologues. *J Biol Chem* *270*, 11445-11452.
- Loppes, R. (1969). A new class of arginine-requiring mutants in *Chlamydomonas reinhardtii*. *Mol. & Gen. Genet.* *104*, 172-177.
- Mikami, A., Tynan, S.H., Hama, T., Luby-Phelps, K., Saito, T., Crandall, J.E., Besharse, J.C., and Vallee, R.B. (2002). Molecular structure of cytoplasmic dynein 2 and its distribution in neuronal and ciliated cells. *J Cell Sci* *115*, 4801-4808.
- Mueller, J., Perrone, C.A., Bower, R., Cole, D.G., and Porter, M.E. (2005). The FLA3 KAP subunit is required for localization of kinesin-2 to the site of flagellar assembly and processive anterograde intraflagellar transport. *Mol Biol Cell* *16*, 1341-1354.
- Patel-King, R.S., Gilberti, R.M., Hom, E.F., and King, S.M. (2013). WD60/FAP163 is a dynein intermediate chain required for retrograde intraflagellar transport in cilia. *Mol Biol Cell* *24*, 2668-2677.
- Pazour, G.J., Wilkerson, C.G., and Witman, G.B. (1998). A dynein light chain is essential for the retrograde particle movement of intraflagellar transport (IFT). *J Cell Biol* *141*, 979-992.
- Pazour, G.J., Dickert, B.L., and Witman, G.B. (1999). The DHC1b (DHC2) isoform of cytoplasmic dynein is required for flagellar assembly. *J Cell Biol* *144*, 473-481.
- Perrone, C.A., Tritschler, D., Taulman, P., Bower, R., Yoder, B.K., and Porter, M.E. (2003). A novel dynein light intermediate chain colocalizes with the retrograde motor for intraflagellar transport at sites of axoneme assembly in *Chlamydomonas* and mammalian cells. *Mol Biol Cell* *14*, 2041-2056.
- Porter, M.E., Power, J., and Dutcher, S.K. (1992). Extragenic suppressors of paralyzed flagellar mutations in

- Chlamydomonas reinhardtii* identify loci that alter the inner dynein arms. *J. Cell Biol.* *118*, 1163-1176.
- Porter, M.E., Bower, R., Knott, J.A., Byrd, P., and Dentler, W. (1999). Cytoplasmic dynein heavy chain 1b is required for flagellar assembly in *Chlamydomonas*. *Mol. Biol. Cell* *10*, 693-712.
- Rompolas, P., Pedersen, L.B., Patel-King, R.S., and King, S.M. (2007). *Chlamydomonas* FAP133 is a dynein intermediate chain associated with the retrograde intraflagellar transport motor. *J Cell Sci* *120*, 3653-3665.
- Sager, R. (1955). Inheritance in the Green Alga *Chlamydomonas Reinhardi*. *Genetics* *40*, 476-489.
- Schmidts, M., Vodopiutz, J., Christou-Savina, S., Cortes, C.R., McInerney-Leo, A.M., Emes, R.D., Arts, H.H., Tuysuz, B., D'Silva, J., Leo, P.J., Giles, T.C., Oud, M.M., Harris, J.A., Koopmans, M., Marshall, M., Elcioglu, N., Kuechler, A., Bockenbauer, D., Moore, A.T., Wilson, L.C., Janecke, A.R., Hurles, M.E., Emmet, W., Gardiner, B., Streubel, B., Dopita, B., Zankl, A., Kayserili, H., Scambler, P.J., Brown, M.A., Beales, P.L., Wicking, C., UK10K, Duncan, E.L., and Mitchison, H.M. (2013). Mutations in the gene encoding IFT dynein complex component WDR34 cause Jeune asphyxiating thoracic dystrophy. *Am J Hum Genet* *93*, 932-944.
- Schmidts, M., Hou, Y., Cortes, C.R., Mans, D.A., Huber, C., Boldt, K., Patel, M., van Reeuwijk, J., Plaza, J.M., van Beersum, S.E., Yap, Z.M., Letteboer, S.J., Taylor, S.P., Herridge, W., Johnson, C.A., Scambler, P.J., Ueffing, M., Kayserili, H., Krakow, D., King, S.M., Beales, P.L., Al-Gazali, L., Wicking, C., Cormier-Daire, V., Roepman, R., Mitchison, H.M., Witman, G.B., and UK10K. (2015). TCTEX1D2 mutations underlie Jeune asphyxiating thoracic dystrophy with impaired retrograde intraflagellar transport. *Nat Commun* *6*, 7074.
- Schnell, R.A., and Lefebvre, P.A. (1993). Isolation of the *Chlamydomonas* regulatory gene *NIT2* by transposon tagging. *Genetics* *134*, 737-747.
- Warr, J.R., McVittie, A., Randall, J.T., and Hopkins, J.M. (1966). Genetic control of flagellar structure in *Chlamydomonas reinhardtii*. *Genet. Res. Camb.* *7*, 335-351.
- Yang, C., Compton, M.M., and Yang, P. (2005). Dimeric novel HSP40 is incorporated into the radial spoke complex during the assembly process in flagella. *Mol Biol Cell* *16*, 637-648.

## Supplemental Figure 1

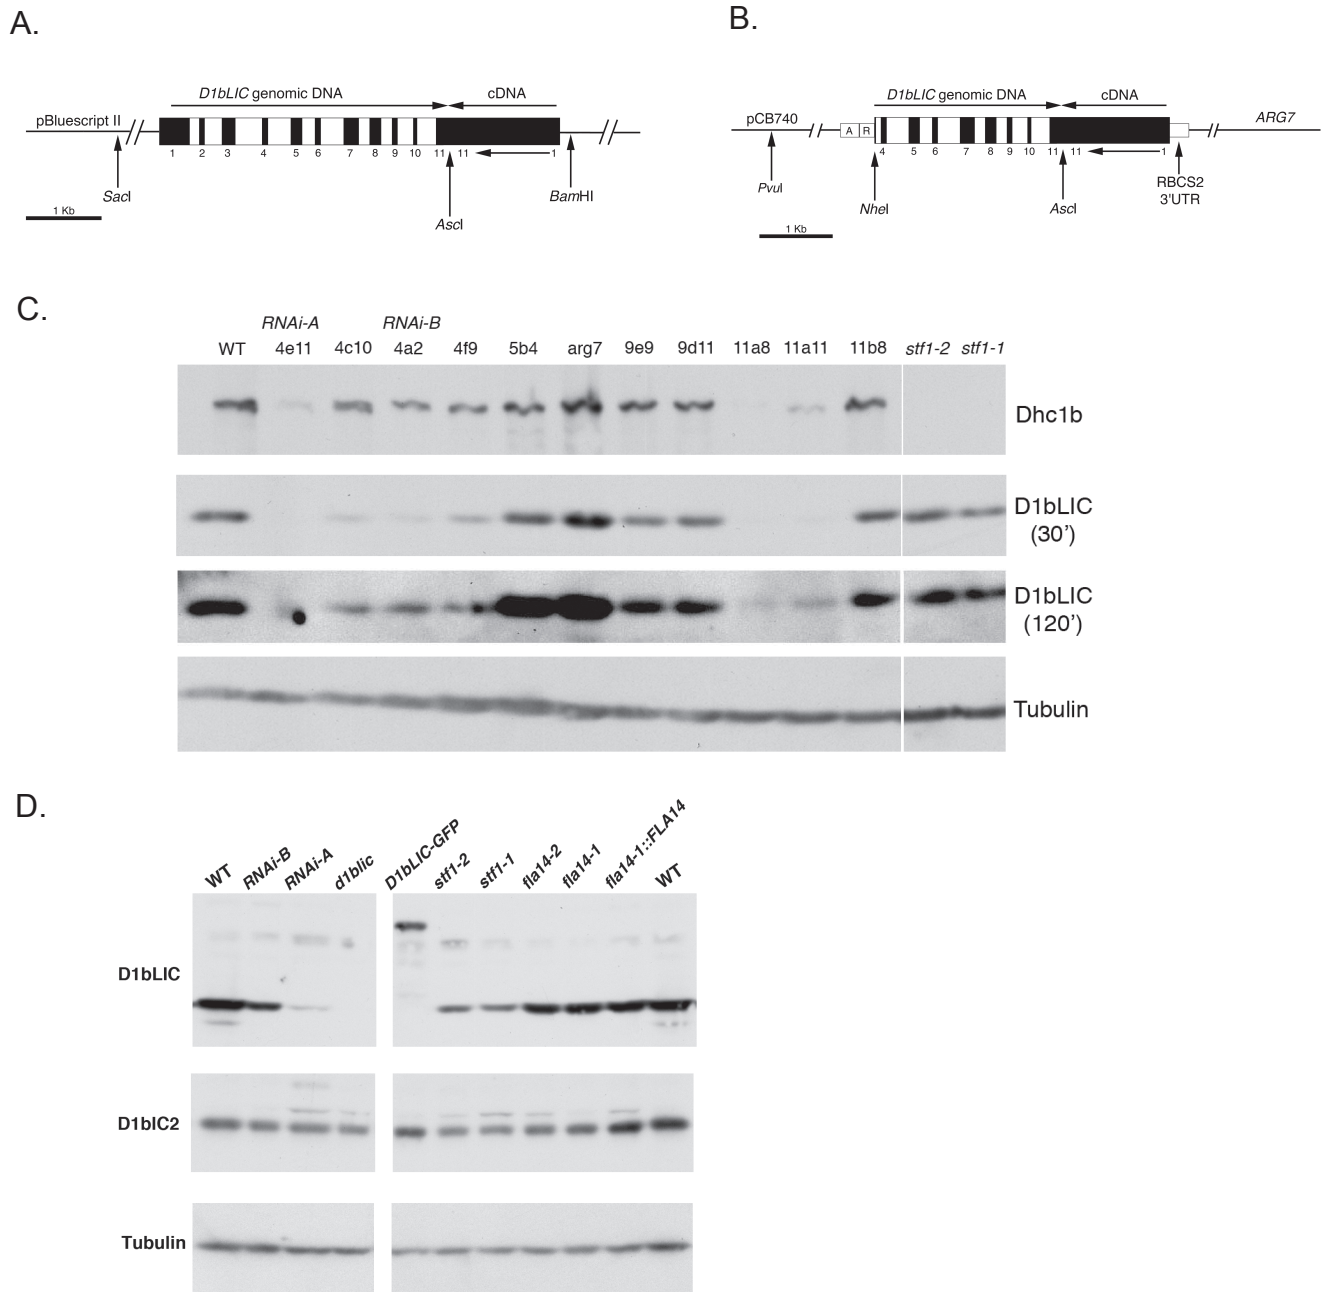

**Figure S1. Strategy used to identify strains that express reduced levels of D1bLIC.** The two constructs used to reduce expression of D1bLIC are shown here. **(A)** A cDNA containing exons 1-11 was inserted in reverse orientation into a genomic *D1bLIC* clone containing exons 1-11 and introduced into a WT strain (A54 e18) by co-transformation with pSI103. **(B)** A second *D1bLIC* antisense construct linked to the *ARG7* gene was introduced into an *arg7* strain. **(C)** Western blot of cell extracts probed with antibodies to DHC1b, D1bLIC, and tubulin identified several transformants that express reduced amounts of D1bLIC. Two different exposures of the D1bLIC blot are shown. Tubulin served as a loading control. The *stf* strains are *dhc1b* null strains (Porter et al., 1999). The 4e11 (*RNAi-A*) and 4a2 (*RNAi-B*) strains were selected for further study. **(D)** A Western blot of cell extracts probed with antibodies to D1bLIC, D1bIC2 (FAP133), and tubulin (loading control).



## Supplemental Figure 2

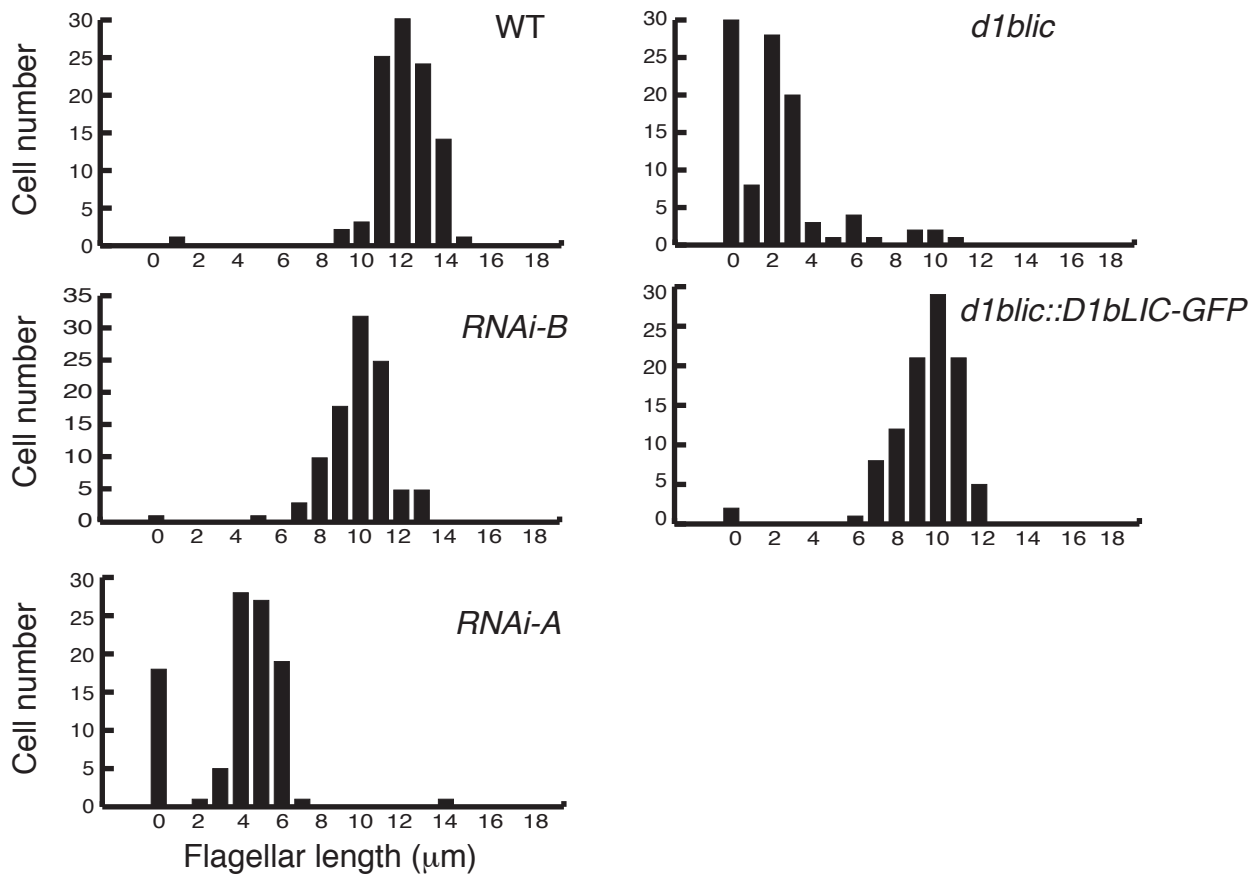

**Figure S2. Flagellar length distributions in WT and *d1blic* mutant cells.** The number and length of flagella present in a population of approximately 100 cells are shown, including cells with no flagella.

### Supplemental Figure 3

A.

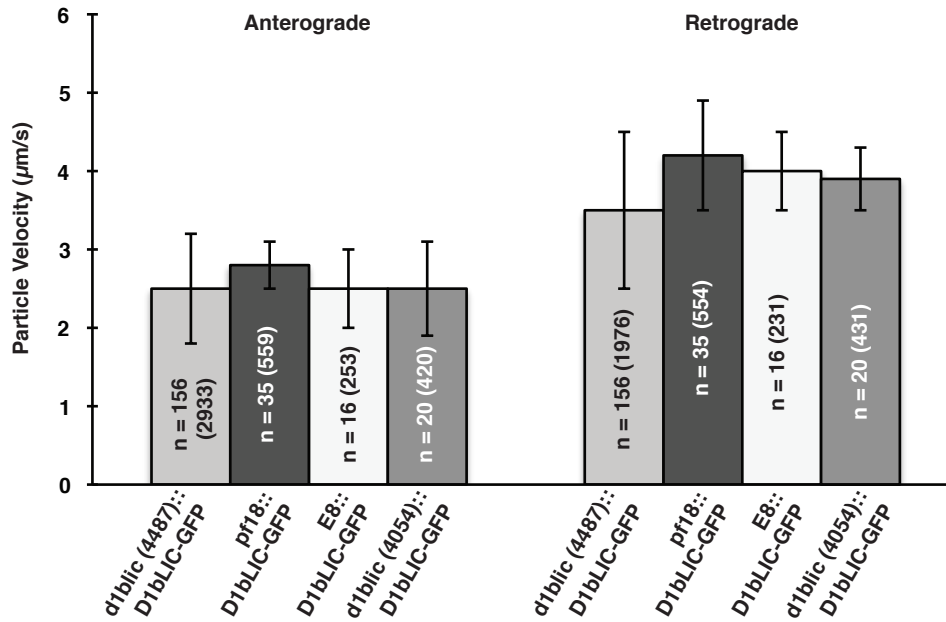

B.

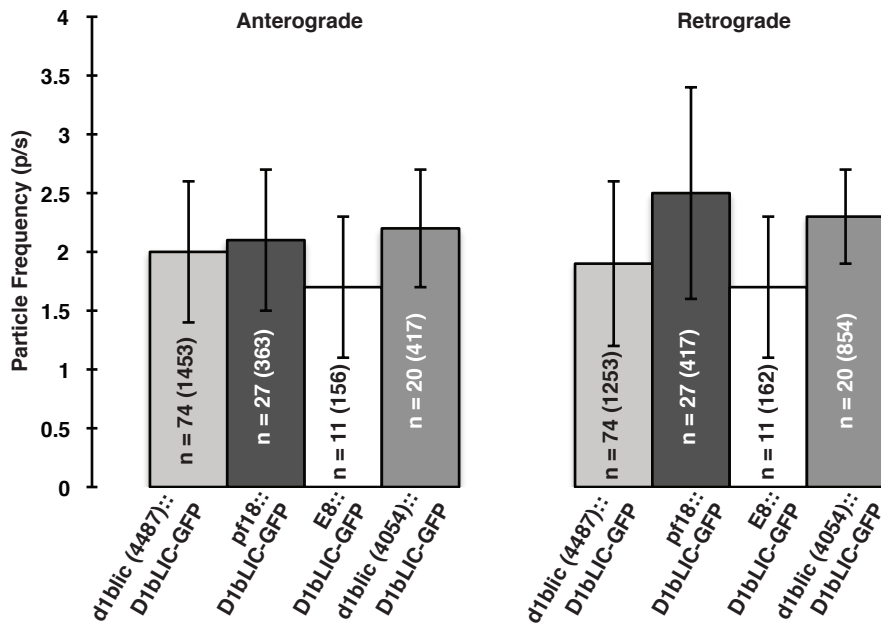

**Figure S3. Movement of D1bLIC-GFP observed by TIRF microscopy in the presence and absence of the endogenous D1bLIC subunit.** Two versions of the *d1blic* mutant (CC-4487 and CC-4054) and two partially paralyzed strains with an endogenous copy of the D1bLIC subunit (*pf18* and *E8*) were transformed with *D1bLIC-GFP*. The movement of D1bLIC-GFP particles in flagella was tracked by TIRF microscopy, and kymographs were analyzed as shown here. **(A)** Average particle velocity, n = flagella and particles measured. **(B)** Average particle frequency, n = flagella and particles measured. Although small differences in IFT particle velocity and frequency were observed between strains, the presence or absence of the endogenous D1bLIC subunit did not significantly alter the observed frequency of D1bLIC-GFP labeled particles. See Videos S7, S8.

Supplemental Figure 4.

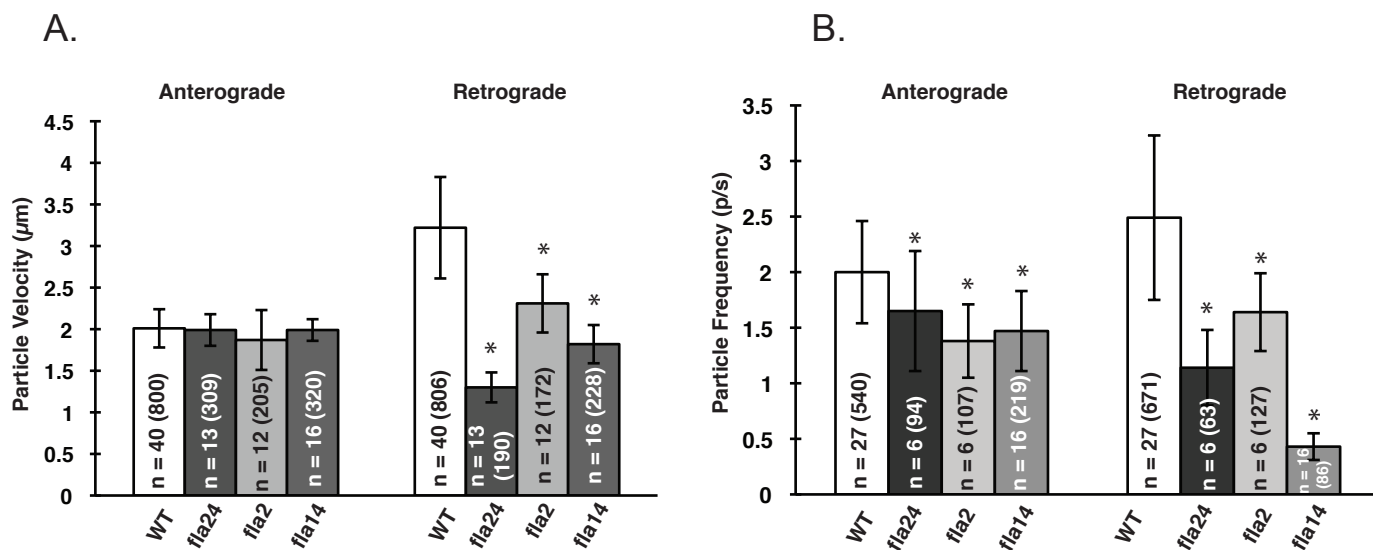

**Figure S4. Transport of IFT particles observed by DIC microscopy in different retrograde mutants.** The transport of IFT particles in flagella of WT and three retrograde mutants (*fla2*, *fla24*, and *fla14*) was analyzed by DIC microscopy at the permissive temperature. **(A)** Average particle velocity, n = number of flagella and particles. **(B)** Average particle frequency, n = number of flagella and particles. Asterisks indicate particle velocities or frequencies that were significantly different from WT ( $P < 0.05$ ). See Videos S9-S11.
